# Supplementary material for: Relationship between Allelic Heterozygosity in BoLA-DRB3 and Proviral Loads in Bovine Leukemia Virus-Infected Cattle
Source: MDPI journal article supplement (doi:10.3390/ani11030647), 2021-03-01
Supplement: s1 [file s1]

Table S1: *BoLA-DRB3* allele frequencies among the main two cattle breeds in this study Japanese Black (JB) and Holstein (H)

| <i>BoLA-DRB3.2</i> allele | Allele frequencies  |                   |
|---------------------------|---------------------|-------------------|
|                           | Japanese Black (JB) | Holstein (H)      |
| *3                        | 37                  | 12 (1 homozygous) |
| *7                        | 19                  | -                 |
| *8                        | 99 (4 homozygous)   | 6                 |
| *11                       | 54                  | 3                 |
| *22                       | 8 (2 homozygous)    | 6                 |
| *24                       | 26                  | 19 (2 homozygous) |
| *28                       | 23                  | 4                 |
| *1                        | 49 (1 homozygous)   | -                 |
| *41                       | 32                  | -                 |
| *10                       | 274 (23 homozygous) | 3                 |
| *16                       | 344 (49 homozygous) | 39 (8 homozygous) |
