# Supplementary figures and images for: Relationship between Allelic Heterozygosity in BoLA-DRB3 and Proviral Loads in Bovine Leukemia Virus-Infected Cattle
Source: MDPI journal article supplement (doi:10.3390/ani11030647), 2021-03-01

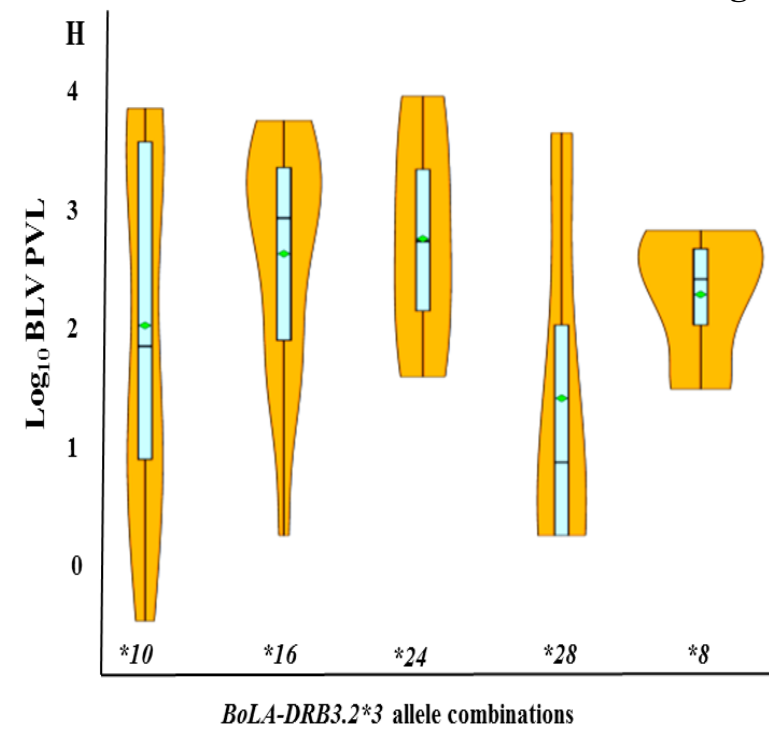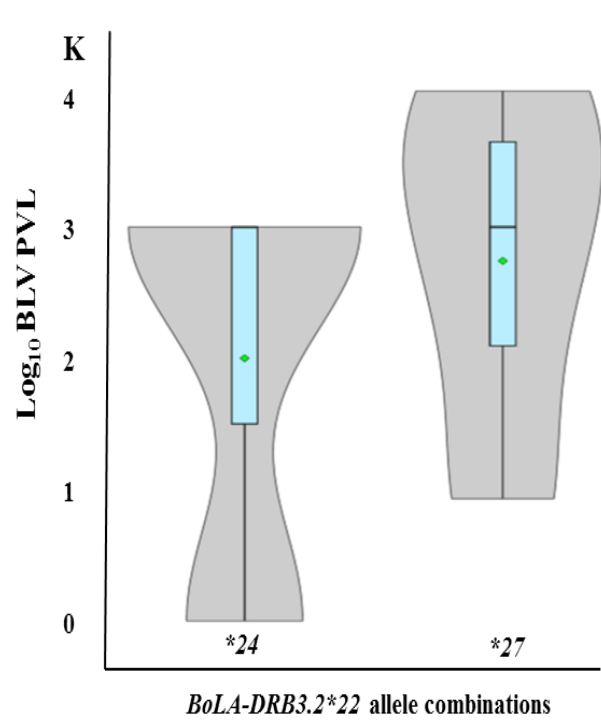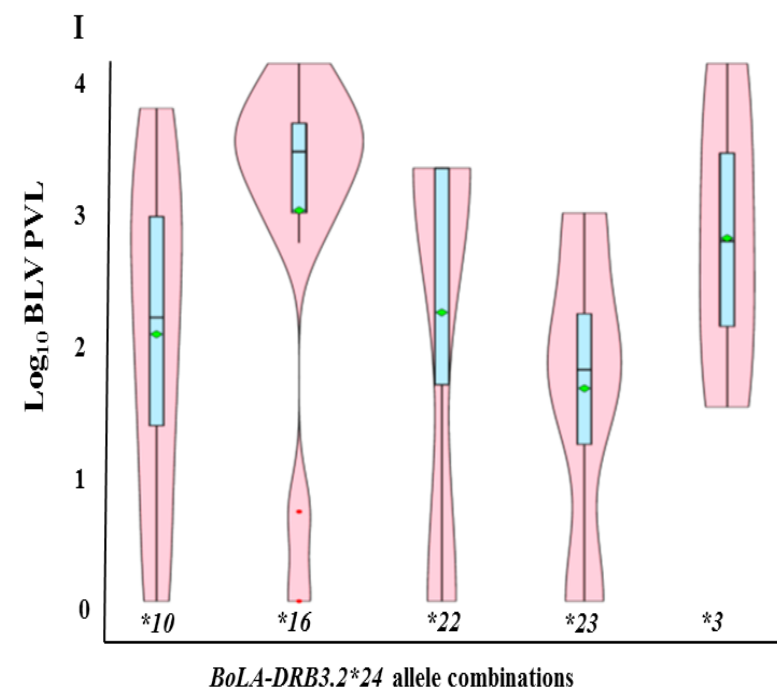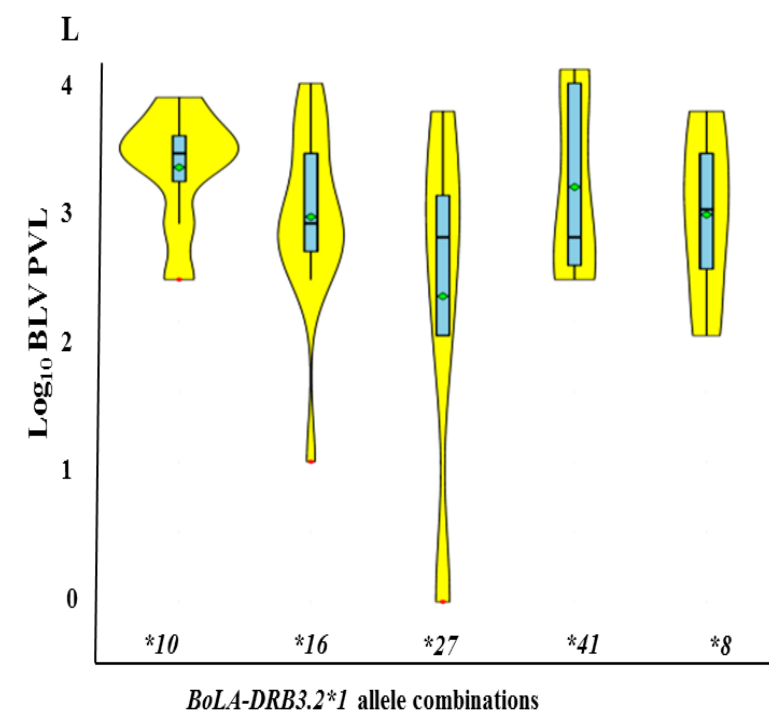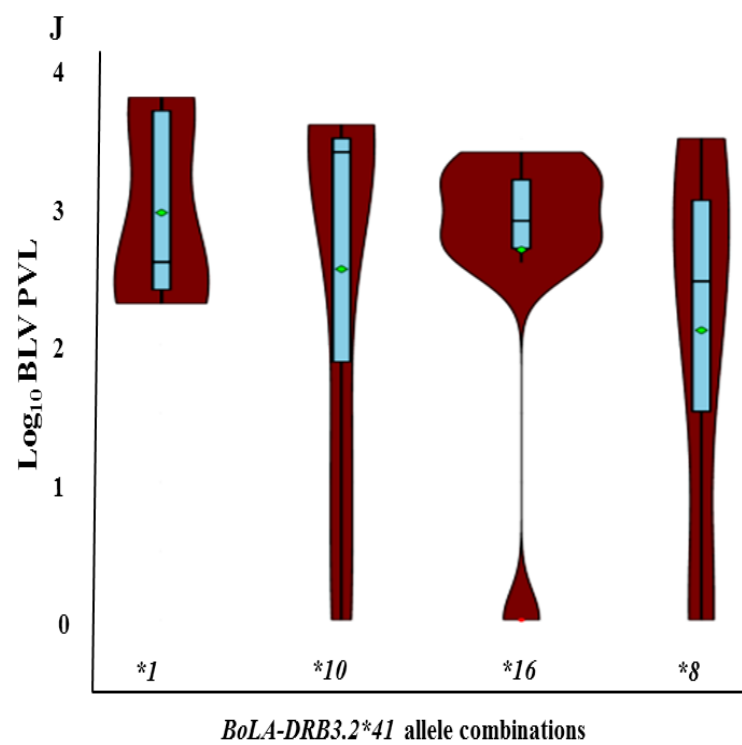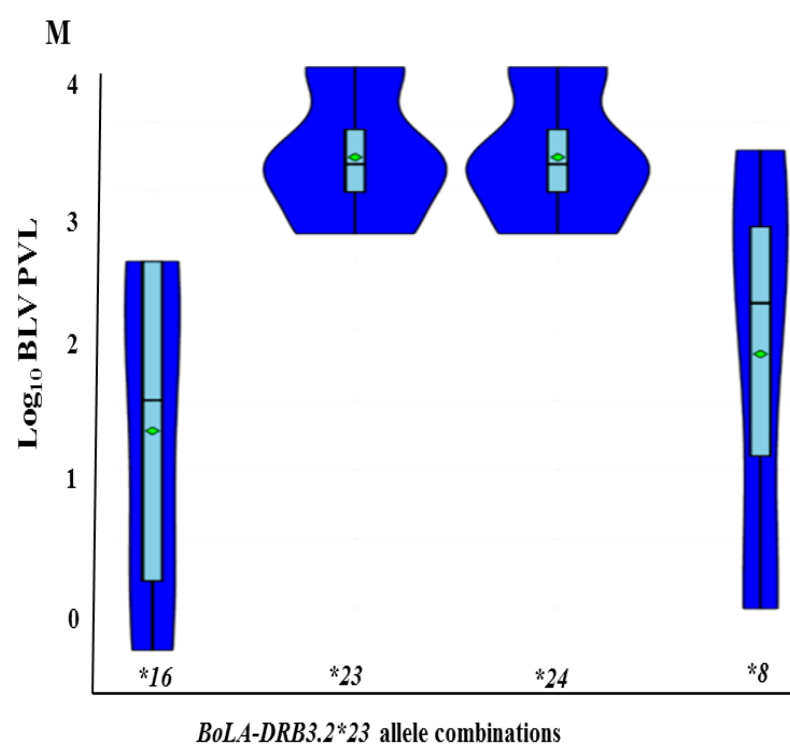

Supplement: s1 [file s1]
